# Supplementary material for: Intake of Saturated Fatty Acids Affects Atherogenic Blood Properties in Young, Caucasian, Overweight Women Even without Influencing Blood Cholesterol
Source: PubMed Central journal article supplement (PMC6267335; doi:10.3390/ijerph15112530), 2018-11-12
Supplement: ijerph-15-02530-s001.pdf [file ijerph-15-02530-s001.pdf]

# Intake of saturated fatty acids affects atherogenic blood properties in young, Caucasian, overweight women even without influencing blood cholesterol

Jadwiga Hamułka <sup>1\*</sup>, Dominika Głąbska <sup>2</sup>, Dominika Guzek <sup>3</sup>, Agnieszka Białkowska <sup>1,4</sup> and Agnieszka Sulich <sup>1</sup>

**Table S1.** Between-group comparison of the food products intake in a diet of participants.

| Food Products               | Age < 40 Years |                       | Age ≥ 40 Years |                       | p **   |
|-----------------------------|----------------|-----------------------|----------------|-----------------------|--------|
|                             | Mean ± SD      | Median (range)        | Mean ± SD      | Median (range)        |        |
| Dairy beverages (g)         | 230.0 ± 164.1  | 189.2<br>(6.7-573.3)  | 210.4 ± 152.6  | 198.3<br>(0.0-623.3)  | 0.6261 |
| Low-fat dairy products (g)  | 47.8 ± 44.5    | 34.4 *<br>(0.0-123.3) | 63.5 ± 53.7    | 50.0 *<br>(0.0-183.3) | 0.2381 |
| High-fat dairy products (g) | 21.8 ± 17.1    | 18.7 *<br>(0.0-67.0)  | 21.6 ± 21.3    | 15.8 *<br>(0.0-90.0)  | 0.7189 |
| Meat (g)                    | 90.4 ± 49.4    | 84.1<br>(0.0-240.0)   | 81.8 ± 38.3    | 76.7<br>(0.0-183.8)   | 0.4353 |
| Meat products (g)           | 66.2 ± 33.3    | 63.3<br>(13.3-160.8)  | 52.9 ± 32.9    | 57.5<br>(0.0-135.0)   | 0.1188 |
| Fish and fish products (g)  | 11.8 ± 23.4    | 0.0 *<br>(0.0-90.0)   | 10.6 ± 19.9    | 0.0 *<br>(0.0-70.0)   | 0.9522 |
| Egg (g)                     | 27.0 ± 17.6    | 25.2<br>(0.0-55.3)    | 25.7 ± 19.6    | 18.8 *<br>(0.0-82.5)  | 0.5266 |
| Plant fats (g)              | 19.7 ± 14.3    | 20.3<br>(0.0-55.0)    | 19.7 ± 17.1    | 16.3 *<br>(0.0-72.3)  | 0.6941 |
| Dairy fats (g)              | 28.6 ± 19.3    | 27.8<br>(0.0-70.0)    | 30.1 ± 19.7    | 27.1 *<br>(2.5-113.8) | 0.8311 |

\* the distribution different than normal (verified using Shapiro-Wilk test –  $p \leq 0.05$ ); \*\* in the case of the normal distribution Student's t-test was applied and distribution different than normal, the Mann-Whitney U test was applied.

**Table S2.** Analysis of the correlation between total cholesterol (TC) blood level and food products intake in overweight women, stratified by age.

| Food Products           | Age < 40 Years |         | Age ≥ 40 Years |         |
|-------------------------|----------------|---------|----------------|---------|
|                         | p              | R       | p              | R       |
| Dairy beverages         | 0.231          | 0.2539  | 0.032          | -0.3315 |
| Low-fat dairy products  | 0.870 *        | -0.0353 | 0.492 *        | 0.1090  |
| High-fat dairy products | 0.216 *        | -0.2621 | 0.381 *        | 0.1386  |
| Meat                    | 0.197          | -0.2728 | 0.009          | 0.4009  |
| Meat products           | 0.012          | 0.5065  | 0.349          | -0.1481 |
| Fish and fish products  | 0.839 *        | 0.0439  | 0.370 *        | 0.1418  |
| Egg                     | 0.743          | -0.0707 | 0.801 *        | -0.0401 |
| Plant fats              | 0.321          | -0.2117 | 0.093 *        | -0.2628 |
| Dairy fats              | 0.097          | 0.3470  | 0.465 *        | 0.1157  |

\* in the case of the distribution different than normal (verified using Shapiro-Wilk test –  $p \leq 0.05$ ), the Spearman's rank correlation was applied (for the normal distribution – the Pearson correlation was applied).

**Table S3.** Analysis of the correlation between low-density lipoprotein (LDL) cholesterol blood level and food products intake in overweight women, stratified by age.

| Food Products           | Age < 40 Years |         | Age ≥ 40 Years |         |
|-------------------------|----------------|---------|----------------|---------|
|                         | <i>p</i>       | R       | <i>p</i>       | R       |
| Dairy beverages         | 0.167          | 0.2916  | 0.025          | -0.3445 |
| Low-fat dairy products  | 0.884 *        | -0.0314 | 0.528*         | 0.1000  |
| High-fat dairy products | 0.214 *        | -0.2631 | 0.405*         | 0.1318  |
| Meat                    | 0.159          | -0.2966 | 0.005          | 0.4250  |
| Meat products           | 0.028          | 0.4481  | 0.201          | -0.2014 |
| Fish and fish products  | 0.839 *        | 0.0439  | 0.418 *        | 0.1284  |
| Egg                     | 0.761          | -0.0654 | 0.764 *        | -0.0478 |
| Plant fats              | 0.464          | -0.1568 | 0.084 *        | -0.2698 |
| Dairy fats              | 0.087          | 0.3569  | 0.468 *        | 0.1150  |

\* in the case of the distribution different than normal (verified using Shapiro-Wilk test –  $p \leq 0.05$ ), the Spearman's rank correlation was applied (for the normal distribution – the Pearson correlation was applied).

**Table S4.** Analysis of the correlation between high-density lipoprotein (HDL) cholesterol blood level and food products intake in overweight women, stratified by age.

| Food Products           | Age < 40 Years |         | Age ≥ 40 Years |         |
|-------------------------|----------------|---------|----------------|---------|
|                         | <i>p</i>       | R       | <i>p</i>       | R       |
| Dairy beverages         | 0.393          | 0.1826  | 0.025          | -0.3445 |
| Low-fat dairy products  | 0.944 *        | -0.0150 | 0.501 *        | 0.1068  |
| High-fat dairy products | 0.220 *        | -0.2598 | 0.399 *        | 0.1336  |
| Meat                    | 0.186          | -0.2796 | 0.009          | 0.3981  |
| Meat products           | 0.057          | 0.3932  | 0.418          | -0.1284 |
| Fish and fish products  | 0.839 *        | 0.0458  | 0.409 *        | 0.1309  |
| Egg                     | 0.825          | -0.0476 | 0.772 *        | -0.0461 |
| Plant fats              | 0.544          | -0.1304 | 0.096 *        | -0.2604 |
| Dairy fats              | 0.115          | 0.3299  | 0.455 *        | 0.1184  |

\* in the case of the distribution different than normal (verified using Shapiro-Wilk test –  $p \leq 0.05$ ), the Spearman's rank correlation was applied (for the normal distribution – the Pearson correlation was applied).

**Table S5.** Analysis of the correlation between total cholesterol to high-density lipoprotein cholesterol blood ratio (TC/HDL) and food products intake in overweight women, stratified by age.

| Food Products           | Age < 40 Years |         | Age ≥ 40 Years |         |
|-------------------------|----------------|---------|----------------|---------|
|                         | <i>p</i>       | R       | <i>p</i>       | R       |
| Dairy beverages         | 0.425          | 0.1707  | 0.068          | -0.2848 |
| Low-fat dairy products  | 0.884 *        | -0.0314 | 0.500 *        | 0.1071  |
| High-fat dairy products | 0.214 *        | -0.2631 | 0.397 *        | 0.1341  |
| Meat                    | 0.314          | -0.2147 | 0.009          | 0.3964  |
| Meat products           | 0.040          | 0.4229  | 0.273          | -0.1732 |
| Fish and fish products  | 0.839 *        | 0.0439  | 0.402 *        | 0.1328  |
| Egg                     | 0.839          | -0.0437 | 0.775 *        | -0.0455 |
| Plant fats              | 0.438          | -0.1660 | 0.092 *        | -0.2634 |
| Dairy fats              | 0.154          | 0.3003  | 0.452 *        | 0.1184  |

\* in the case of the distribution different than normal (verified using Shapiro-Wilk test –  $p \leq 0.05$ ), the Spearman's rank correlation was applied (for the normal distribution – the Pearson correlation was applied).

**Table S6.** Analysis of the correlation between high-density lipoprotein cholesterol to low-density lipoprotein cholesterol blood ratio (HDL/LDL) and food products intake in overweight women, stratified by age.

| Food Products           | Age < 40 Years |         | Age ≥ 40 Years |         |
|-------------------------|----------------|---------|----------------|---------|
|                         | <i>p</i>       | R       | <i>p</i>       | R       |
| Dairy beverages         | 0.407 *        | 0.1774  | 0.060 *        | -0.2923 |
| Low-fat dairy products  | 0.883 *        | -0.0314 | 0.500 *        | 0.1071  |
| High-fat dairy products | 0.214 *        | -0.2631 | 0.397 *        | 0.1341  |
| Meat                    | 0.284 *        | -0.2279 | 0.007 *        | 0.4093  |
| Meat products           | 0.207 *        | 0.2671  | 0.460 *        | -0.1171 |
| Fish and fish products  | 0.839 *        | 0.0439  | 0.402 *        | 0.1328  |
| Egg                     | 0.643 *        | -0.0996 | 0.775 *        | -0.0455 |
| Plant fats              | 0.386 *        | -0.1854 | 0.092 *        | -0.2634 |
| Dairy fats              | 0.123 *        | 0.3235  | 0.452 *        | 0.1193  |

\* in the case of the distribution different than normal (verified using Shapiro-Wilk test –  $p \leq 0.05$ ), the Spearman's rank correlation was applied (for the normal distribution – the Pearson correlation was applied).

**Table S7.** Analysis of the correlation between triglyceride blood level and food products intake in overweight women, stratified by age.

| Food Products           | Age < 40 Years |         | Age ≥ 40 Years |         |
|-------------------------|----------------|---------|----------------|---------|
|                         | <i>p</i>       | R       | <i>p</i>       | R       |
| Dairy beverages         | 0.382 *        | 0.1870  | 0.060 *        | -0.2924 |
| Low-fat dairy products  | 0.876 *        | -0.0336 | 0.505 *        | 0.1057  |
| High-fat dairy products | 0.213 *        | -0.2638 | 0.388 *        | 0.1366  |
| Meat                    | 0.301 *        | -0.2200 | 0.007 *        | 0.4107  |
| Meat products           | 0.219 *        | 0.2607  | 0.483 *        | -0.1113 |
| Fish and fish products  | 0.846 *        | 0.0420  | 0.397 *        | 0.1342  |
| Egg                     | 0.638 *        | -0.1012 | 0.794 *        | -0.0416 |
| Plant fats              | 0.365 *        | -0.1933 | 0.095 *        | -0.0261 |
| Dairy fats              | 0.117 *        | 0.3288  | 0.435 *        | 0.1237  |

\* in the case of the distribution different than normal (verified using Shapiro-Wilk test –  $p \leq 0.05$ ), the Spearman's rank correlation was applied (for the normal distribution – the Pearson correlation was applied).

**Table S8.** Analysis of the correlation between the Atherogenic Index of Plasma (AIP) and food products intake in overweight women, stratified by age.

| Food Products           | Age < 40 Years |         | Age ≥ 40 Years |         |
|-------------------------|----------------|---------|----------------|---------|
|                         | <i>p</i>       | R       | <i>p</i>       | R       |
| Dairy beverages         | 0.238          | 0.2503  | 0.065          | -0.2876 |
| Low-fat dairy products  | 0.884 *        | -0.0317 | 0.060 *        | -0.2924 |
| High-fat dairy products | 0.213 *        | -0.2683 | 0.500 *        | 0.1071  |
| Meat                    | 0.193          | -0.2754 | 0.007          | 0.4105  |
| Meat products           | 0.021          | 0.4691  | 0.301          | -0.1634 |
| Fish and fish products  | 0.846 *        | 0.0420  | 0.402 *        | 0.1328  |
| Egg                     | 0.476          | -0.1526 | 0.775 *        | -0.0455 |
| Plant fats              | 0.375          | -0.1895 | 0.092 *        | -0.2634 |
| Dairy fats              | 0.138          | 0.3119  | 0.452 *        | 0.1193  |

\* in the case of the distribution different than normal (verified using Shapiro-Wilk test –  $p \leq 0.05$ ), the Spearman's rank correlation was applied (for the normal distribution – the Pearson correlation was applied).
